# Supplementary material for: Synthesis and application of ternary photocatalyst with a gradient band structure from two-dimensional nanosheets as precursors
Source: Royal Society of Chemistry journal article supplement (doi:10.1039/c6ra23137c), 2016-01-01
Supplement: c6ra23137c1.pdf [file c6ra23137c1.pdf]

## **Supplementary Information**

### **Synthesis and application ternary photocatalyst with a gradient band structure from two-dimensional nanosheets as precursors**

Chenjuan Zhou, Jing Yan, Binhe Chen, Peiran Li, Xiaoping Dong\*, Fengna Xi,

Jiyang Liu\*

Department of Chemistry, School of Sciences, Zhejiang Sci-Tech University, 928

Second Avenue, Xiasha Higher Education Zone, Hangzhou 310018, China

\*Corresponding author. E-mail: [xpdong@zstu.edu.cn](mailto:xpdong@zstu.edu.cn); [liujyxx@126.com](mailto:liujyxx@126.com)

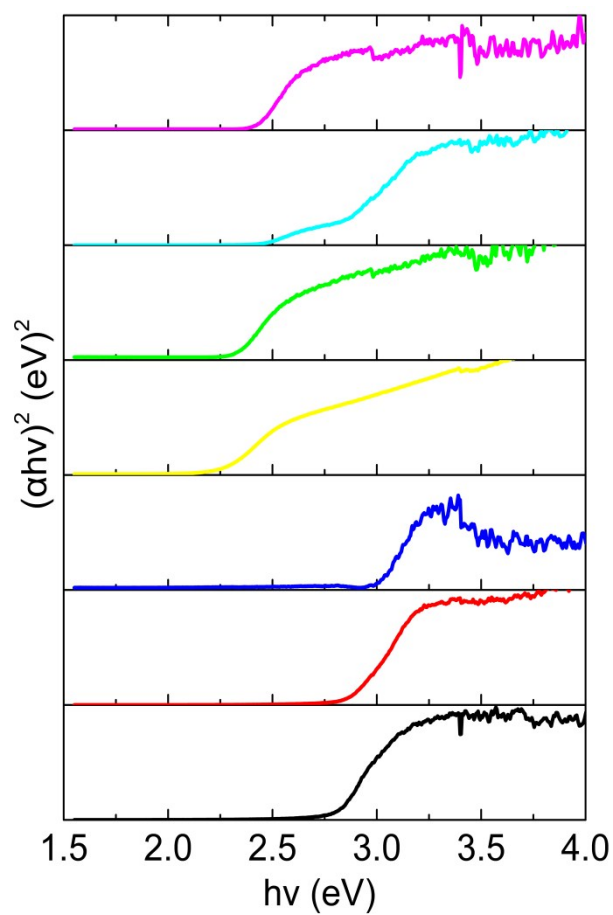

**Fig. S1**  $(\alpha h\nu)^2$  versus photon energy ( $h\nu$ ) curves of all the samples.

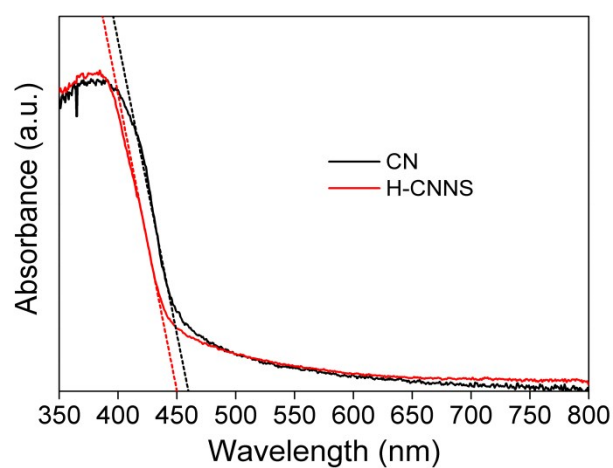

**Fig. S2** The comparison of absorption curves of CN and H-CNNS.

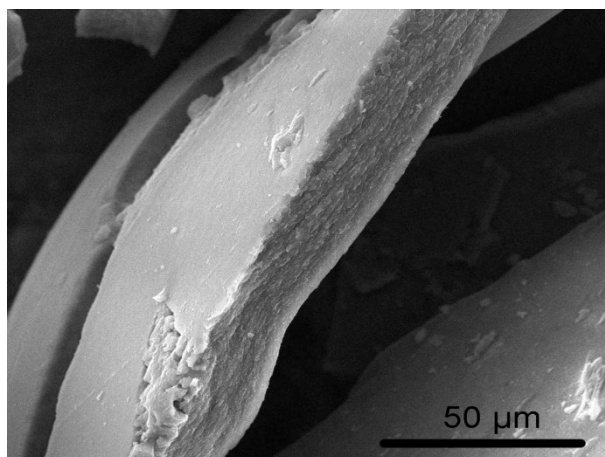

**Fig. S3** The SEM image of restacked CNNS

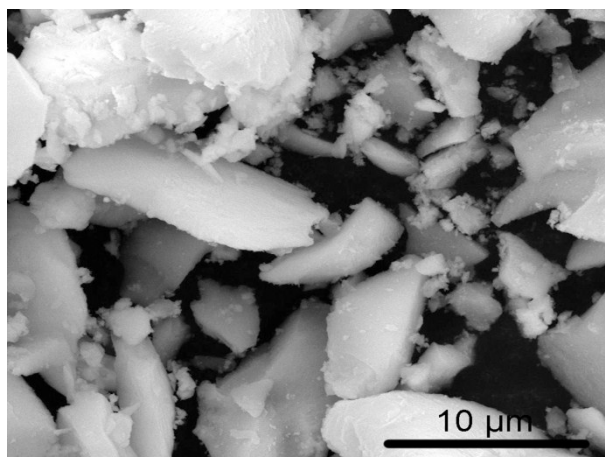

**Fig. S4** The SEM image of CdS.

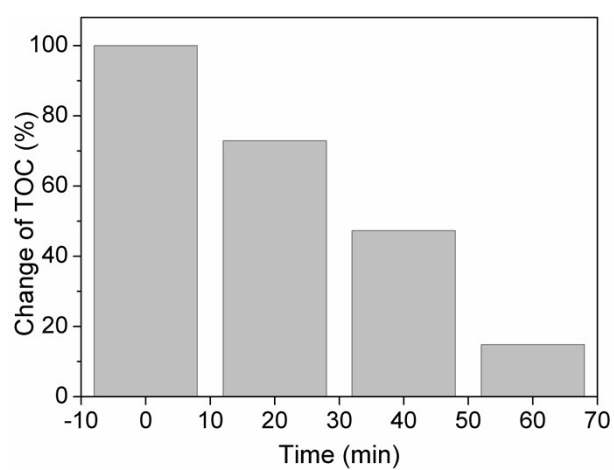

**Fig. S5** The TOC removal efficiency of RhB (10 mg L<sup>-1</sup>) of CNNS/CdS/rGO. The initial TOC concentration of RhB solution is 15.5 mg L<sup>-1</sup>.

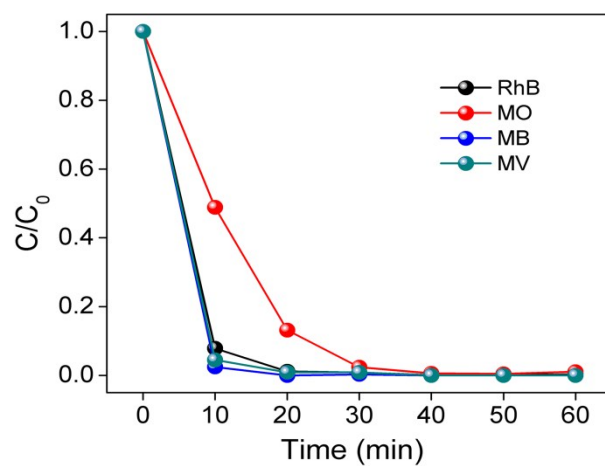

**Fig. S6** The degradation performance of CNNS/CdS/rGO for different dyes.

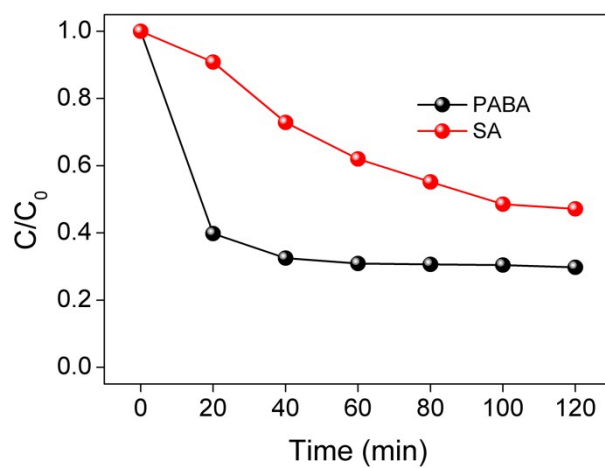

**Fig. S7** The degradation performance of CNNS/CdS/rGO for colorless organics.
